# Supplementary material for: Phosphorus-doped porous carbon nitride for efficient sole production of hydrogen peroxide via photocatalytic water splitting with a two-channel pathway
Source: Royal Society of Chemistry journal article supplement (doi:10.1039/c9ta13929j), 2020-01-01
Supplement: c9ta13929j1.pdf [file c9ta13929j1.pdf]

## Supporting Information

Phosphorus-doped porous carbon nitride for efficient sole  
production of hydrogen peroxide via photocatalytic water splitting  
with a two-channel pathway

*Jingjing Cao,<sup>§</sup> Hui Wang,<sup>§</sup> Yajie Zhao, Yan Liu, Hui Huang\*, Mingwang Shao\*, Yang  
Liu\* and Zhenhui Kang\**

Institute of Functional Nano and Soft Materials Laboratory (FUNSOM), Jiangsu Key  
Laboratory for Carbon-Based Functional Materials & Devices, Soochow University,  
Suzhou 215123, PR China

\*Correspondence to: [hhuang0618@suda.edu.cn](mailto:hhuang0618@suda.edu.cn), [yangl@suda.edu.cn](mailto:yangl@suda.edu.cn),  
[zhkang@suda.edu.cn](mailto:zhkang@suda.edu.cn)

§ These authors contributed equally to this work.

## 1. Quantum efficiency (QE) calculation.

In the following, the QE determination was described at  $\lambda_0 = 420$  nm for CPN. The 10 mg catalyst was added to 15 mL water, and the catalyst solution was irradiated for 8 h. The average intensity of irradiation was determined to be 31.27 mW/cm<sup>2</sup> and the irradiation area was 9.07 cm<sup>2</sup>. The number of incident photons (N) is  $1.73 \times 10^{22}$  as calculated by equation (1). The amount of H<sub>2</sub>O<sub>2</sub> molecules generated in 8 h was 225  $\mu$ mol. The quantum efficiency is calculated from the following equation (2).

$$N = \frac{E\lambda}{hc} = \frac{31.27 \times 10^{-3} \times 9.07 \times 3600 \times 8 \times 420 \times 10^{-9}}{6.626 \times 10^{-34} \times 3 \times 10^8} = 1.73 \times 10^{22} \quad (1)$$

$$QE = \frac{2 \times \text{the number of evolved } H_2O_2}{\text{the number of incident photons}} \times 100\% \\ = \frac{2 \times 6.02 \times 10^{23} \times 225 \times 10^{-6}}{1.73 \times 10^{22}} \times 100\% = 1.57\% \quad (2)$$

## 2. SCC conversion efficiency calculation from solar simulator measurement.

For the determination of SCC efficiency, a solar simulator ( $420 \text{ nm} \leq \lambda \leq 700 \text{ nm}$ ) was used with 10 mg catalyst and 15 mL ultra-pure water under at atmospheric pressure. The amount of  $\text{H}_2\text{O}_2$  molecules generated in 8 h was 157  $\mu\text{mol}$ . The free energy for  $\text{H}_2\text{O}_2$  formation is 117  $\text{kJ mol}^{-1}$ . After 8 h illumination, the average intensity of light source was determined to be 16.47  $\text{mW/cm}^2$  and the irradiation area was calculated as 9.07  $\text{cm}^2$ . Therefore, the total input energy is 0.149 W. Finally, the SCC is determined to 0.43%. At the same time, a AM 1.5G solar simulator ( $100 \text{ mW/cm}^2$ ) was also used to determine the SCC efficiency, with 10 mg catalyst and 15 mL ultra-pure water under at atmospheric pressure. The amount of  $\text{H}_2\text{O}_2$  molecules generated in 2 h was 75  $\mu\text{mol}$ . Finally, the SCC is determined to 0.14%.

$$\begin{aligned} \text{SCC efficiency (\%)} &= \\ &= \frac{[\Delta G \text{ for } \text{H}_2\text{O}_2 \text{ generation (J mol}^{-1}\text{)}] \times [\text{H}_2\text{O}_2 \text{ formed (mol)}]}{[\text{total input energy (w)}] \times [\text{reaction time (s)}]} \times 100 \\ &= \frac{117 \times 1000 \times 157 \times 10^{-6}}{0.149 \times 8 \times 60 \times 60} \times 100\% = 0.43\% \end{aligned}$$

$$\begin{aligned} \text{SCC efficiency (\%)} &= \\ &= \frac{[\Delta G \text{ for } \text{H}_2\text{O}_2 \text{ generation (J mol}^{-1}\text{)}] \times [\text{H}_2\text{O}_2 \text{ formed (mol)}]}{[\text{total input energy (w)}] \times [\text{reaction time (s)}]} \times 100 \\ &= \frac{117 \times 1000 \times 75 \times 10^{-6}}{0.907 \times 2 \times 60 \times 60} \times 100\% = 0.14\% \end{aligned}$$

## 3. Electron transfer number calculation.

The test data are stored in a CHI920C electrochemical workstation (CH Instruments, Shanghai, China). The electron transfer number ( $n$ ) can be calculated according to the following formula.  $n = 4I_d / (I_d + I_r/N)$ . Where  $I_d$  and  $I_r$  represent the disk and ring current respectively, and  $N$  is the rotating disk-ring electrode (RRDE) collection efficiency. The averaged collection efficiency  $N$  is 0.43. To determine the electron transfer number ( $n$ ), photocatalysts modified RRDE electrodes measurements were performed in  $\text{N}_2$ -saturated ultrapure water at a rotating speed of 1600 rpm and a scan rate of  $10 \text{ mV} \cdot \text{s}^{-1}$ . The disk potential was set at open-circuit voltage, while the ring potential was set at 0.9

V vs. SCE to detect  $\text{H}_2\text{O}_2$  generation.

### 3. Supplementary figures.

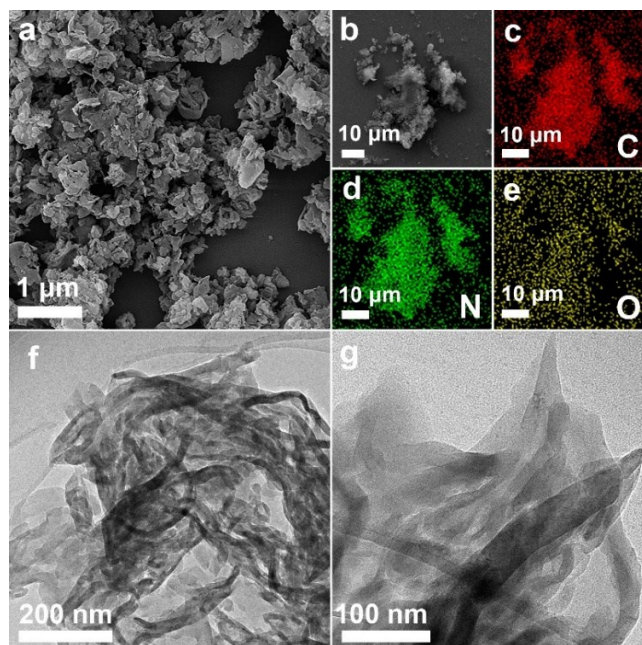

**Figure S1.** (a) and (b) SEM images of  $\text{C}_3\text{N}_4$ . (c-e) The corresponding EDS elemental mappings of constituent elements of  $\text{C}_3\text{N}_4$ . (f) and (g) TEM images of  $\text{C}_3\text{N}_4$ .

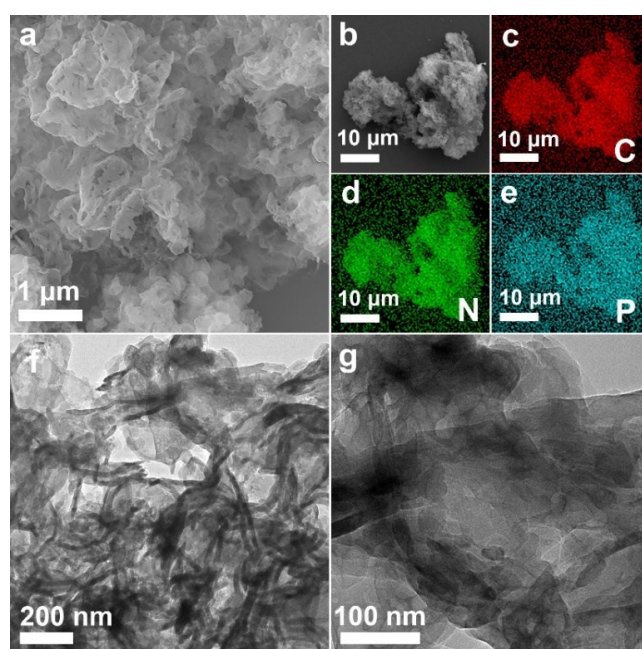

**Figure S2.** (a) and (b) SEM images of CP. (c-e) The corresponding EDS elemental mappings of constituent elements of CP. (f) and (g) TEM images of CP.

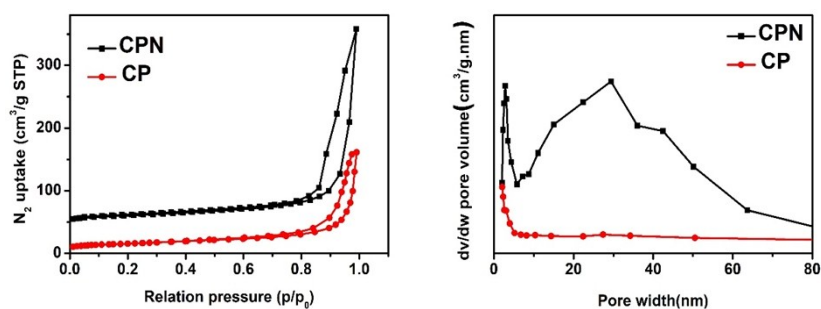

**Figure S3.** (a) The Nitrogen adsorption–desorption isotherms of CP (red line) and CPN (black line).

(b) The pore size distribution curves of CP (red line) and CPN (black line).

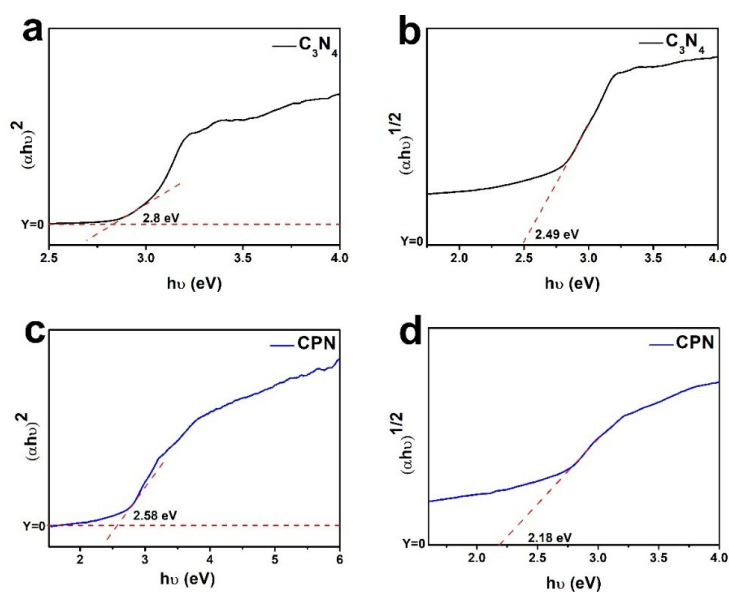

**Figure S4.** Determination of band gap of  $C_3N_4$  composition based on Kubelka–Munk function (a)

when  $r=2$  and (b) when  $r=1/2$ . Determination of band gap of CPN composition based on Kubelka–

Munk function (c) when  $r=2$  and (d) when  $r=1/2$ . (Fig. S4a and S4c show good linear fit when using

$r = 2$ , (no good linear fit is obtained from  $r = 1/2$ ) and consistent with previous work, proving  $C_3N_4$

and CPN are direct band gap materials).



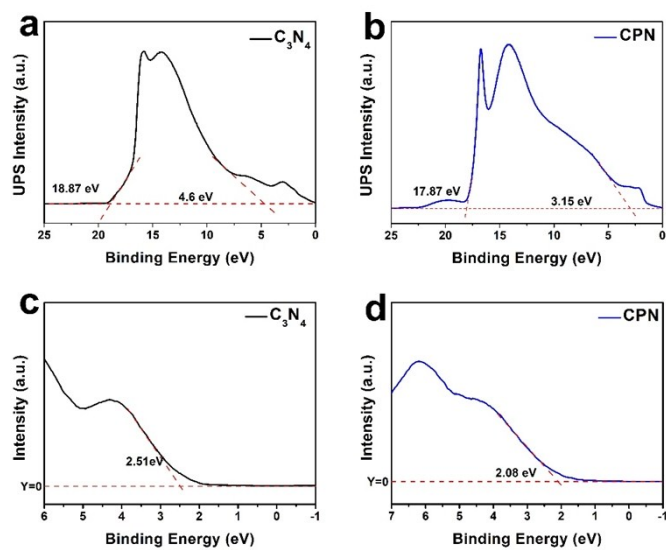

**Figure S5.** The UPS spectra of (a)  $C_3N_4$  and (b) CPN. VB XPS spectra of (c)  $C_3N_4$  and (d) CPN.

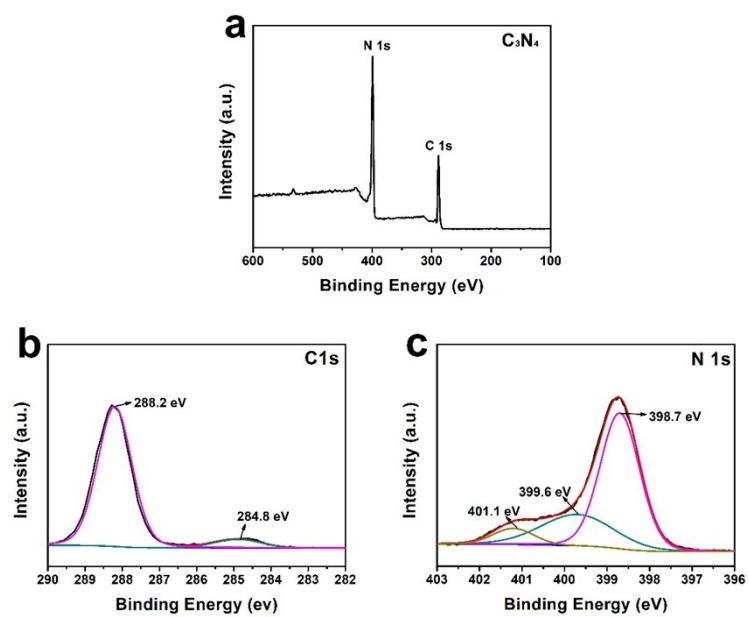

**Figure S6.** (a) XPS survey spectra and high-resolution XPS spectra of  $C_3N_4$  for (b) C 1s and (c) N

1s.

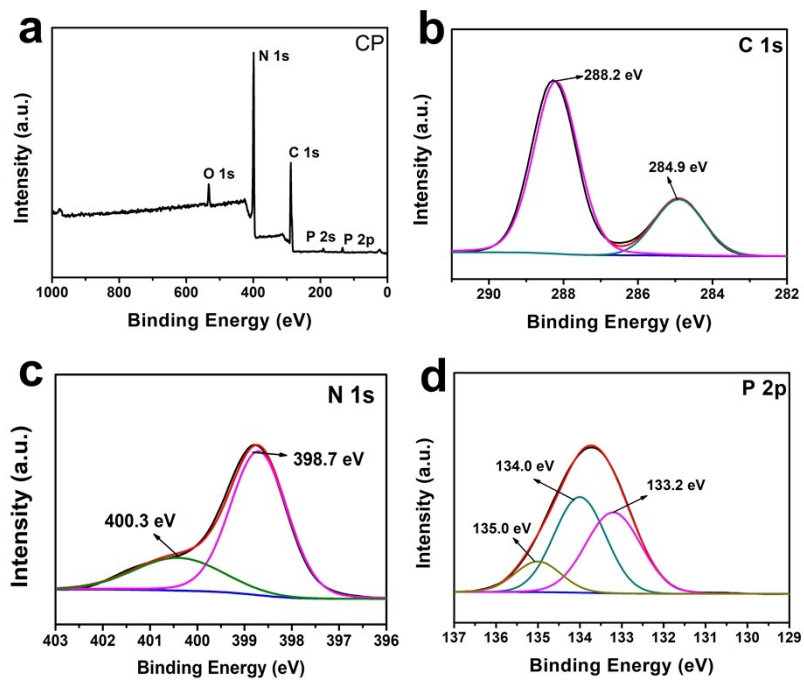

**Figure S7.** (a) XPS survey spectra and high-resolution XPS spectra of CP for (b) C 1s, (c) N 1s and (d) P 2p.

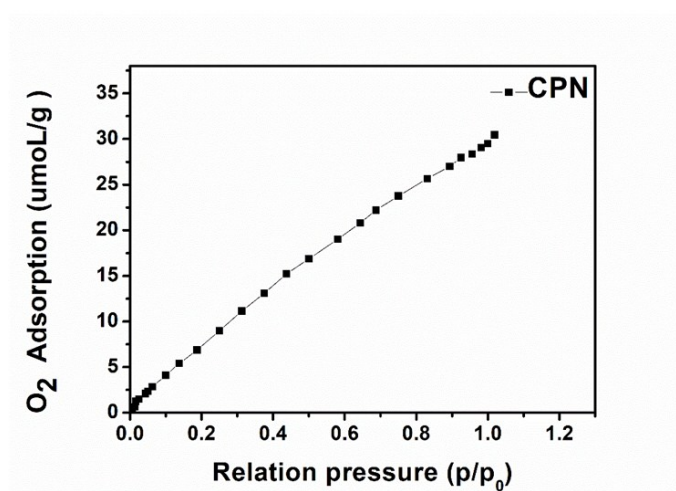

**Figure S8.** O<sub>2</sub> adsorption isotherm of CPN at 298 K.



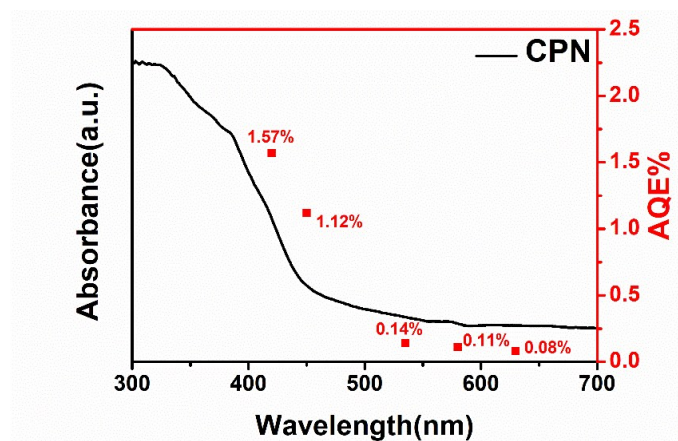

**Figure S9.** The quantum efficiency of CPN at different wavelengths.

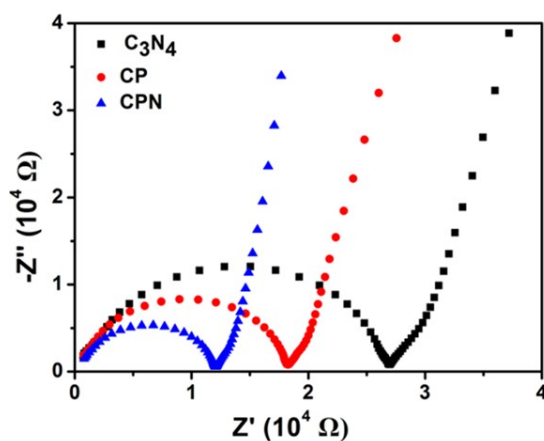

**Figure S10.** EIS Nyquist plots spectra of  $C_3N_4$  (black line), CP (red line) and CPN (blue line).

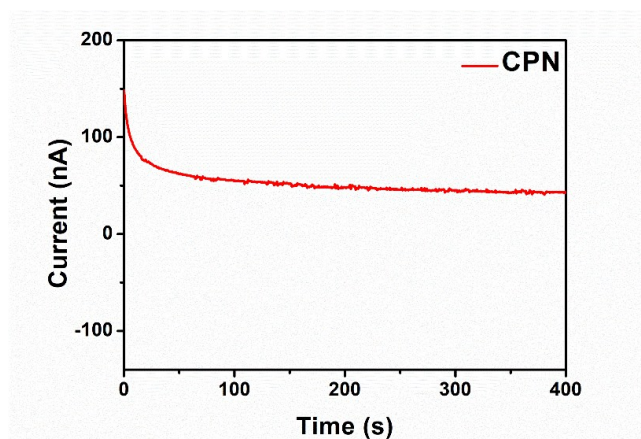

**Figure S11.** The i-t curve of CPN. (The photocurrent was measured at open circuit potential in 0.1

M  $Na_2SO_4$  solution with light irradiation of  $\lambda > 420$  nm (scan rate:  $50$  mV  $s^{-1}$ ).

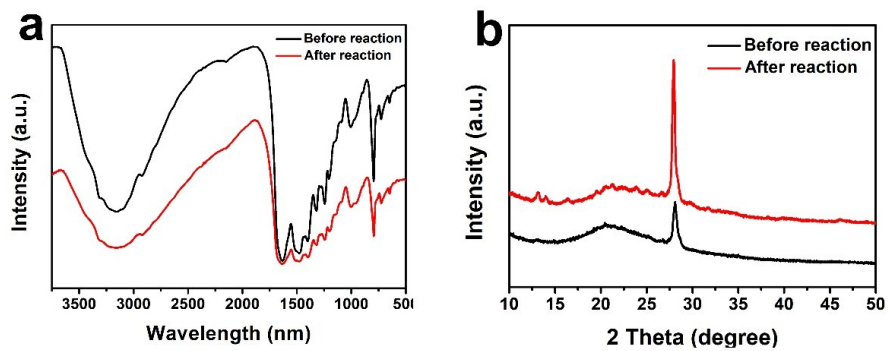

**Figure S12.** Comparison of FTIR spectra and XRD patterns before (black line) and after (red line) six cycles of CPN.

#### 4. Supplementary tables.

**Table S1.** Atomic percentage of different elements according to EDS elemental mappings.

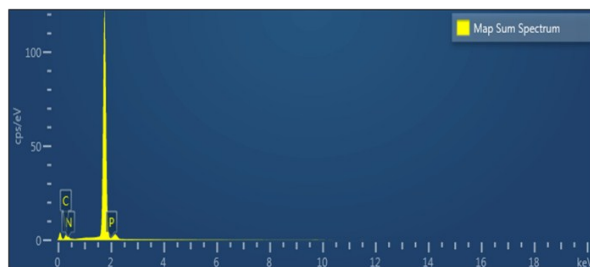

| Map Sum Spectrum |          |
|------------------|----------|
| Element          | Atomic % |
| C                | 35.56    |
| N                | 60.04    |
| P                | 4.4      |
| Total            | 100      |

**Table S2.** Atomic percentage of different elements according to XPS.

| Element | Atomic % |
|---------|----------|
| C       | 35.09    |
| N       | 53.35    |
| O       | 5.84     |
| P       | 5.72     |
| Total   | 100      |

**Table S3.** The analysis of the percentages of different bonds according to XPS.

| Sample | P=N (%) | P-N (%) | P=O (%) |
|--------|---------|---------|---------|
| CP     | 0.44    | 0.43    | 0.13    |
| CPN    | 0.26    | 0.70    | 0.04    |
